# Supplementary figures and images for: Lpcat3-dependent production of arachidonoyl phospholipids is a key determinant of triglyceride secretion
Source: eLife journal article supplement (doi:10.7554/elife.06557), 2015-03-25

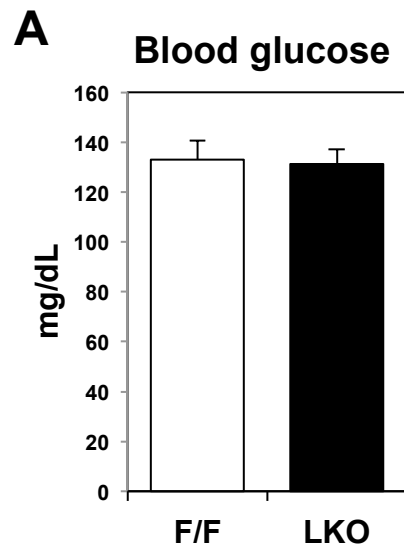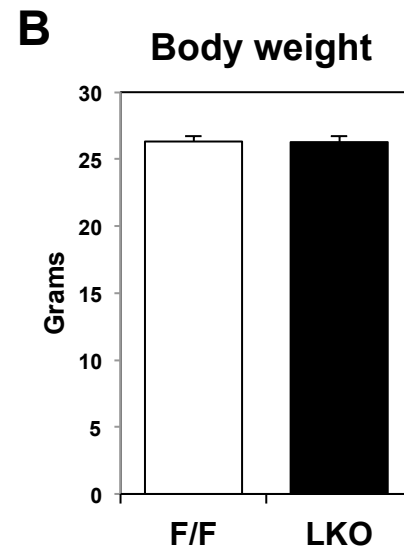

Supplement: supp [file elife_poa_e06557_Figure_2_figure_supplement_1.pdf › elife_poa_e06557_Figure_2_figure_supplement_1.pdf]

**A**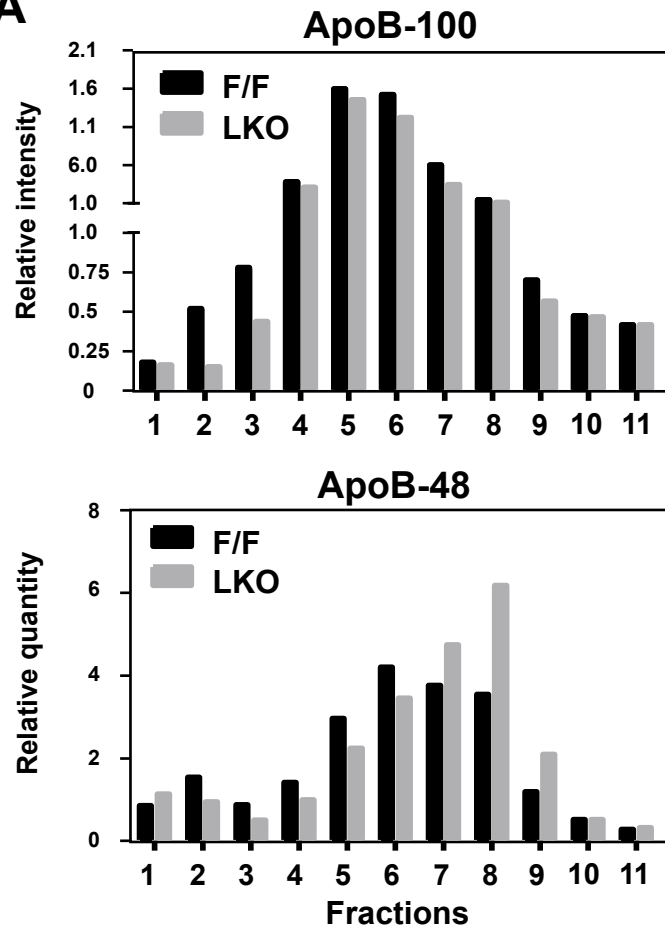**B**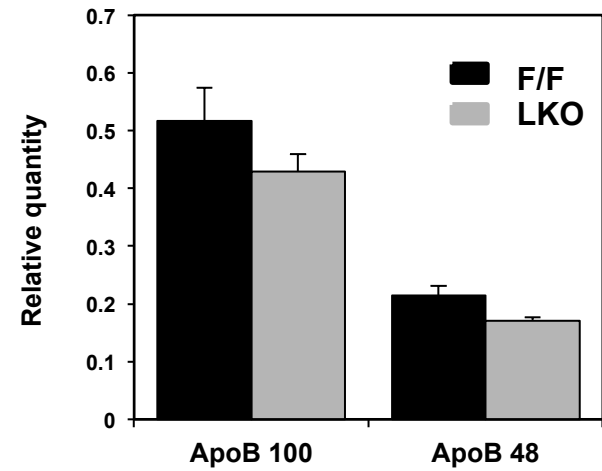

Supplement: supp [file elife_poa_e06557_Figure_2_figure_supplement_2.pdf › elife_poa_e06557_Figure_2_figure_supplement_2.pdf]

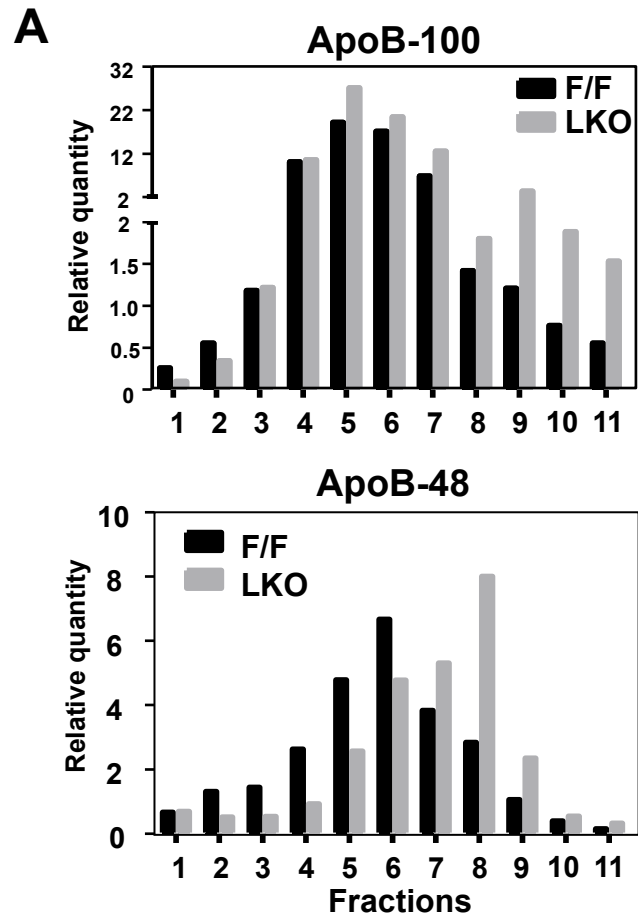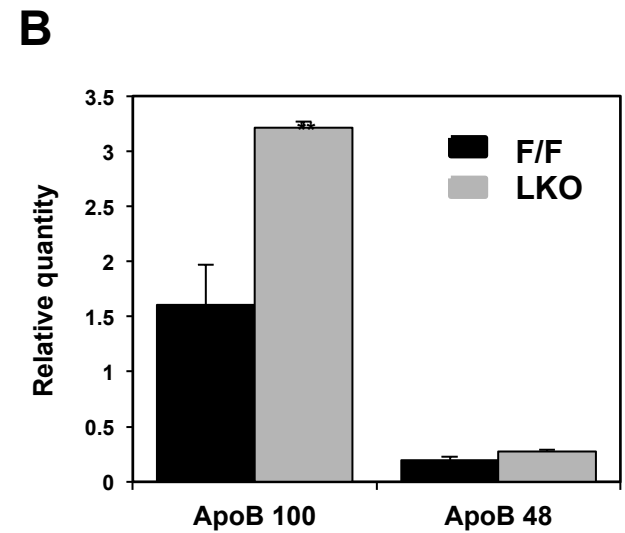

Supplement: supp [file elife_poa_e06557_Figure_3_figure_supplement_1.pdf › elife_poa_e06557_Figure_3_figure_supplement_1.pdf]

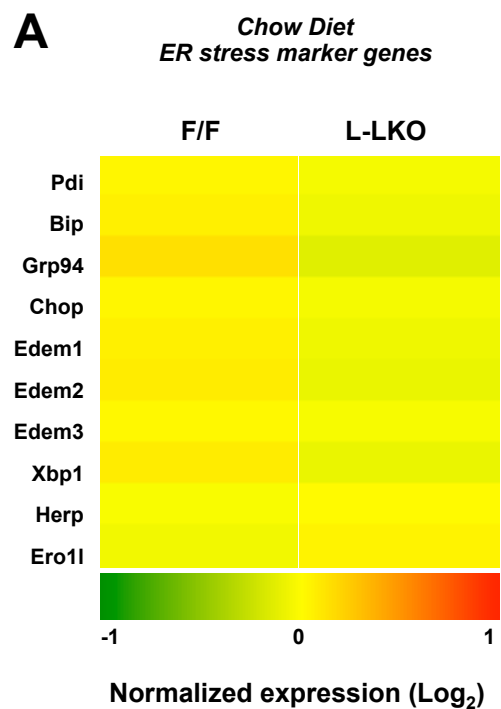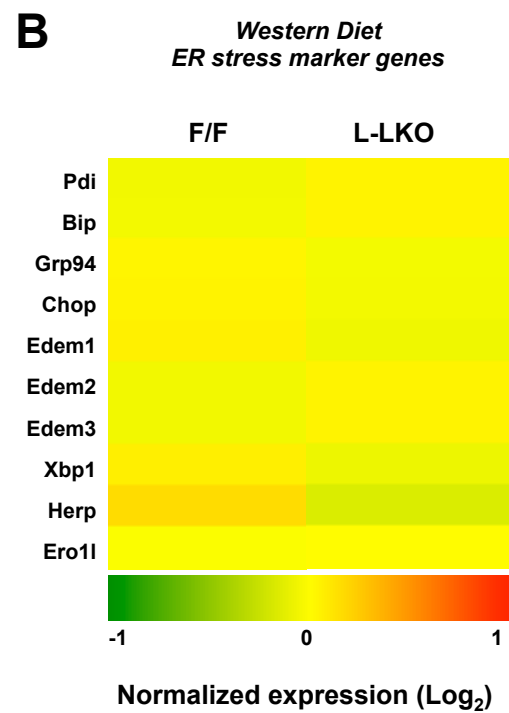

Supplement: supp [file elife_poa_e06557_Figure_7_figure_supplement_1.pdf › elife_poa_e06557_Figure_7_figure_supplement_1.pdf]

**A****Flox/Flox**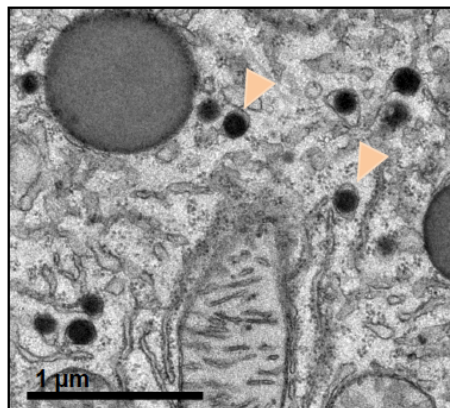**Flox/Flox**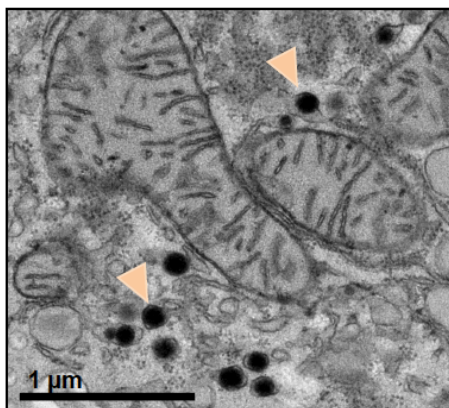**L-Lpcat3 KO**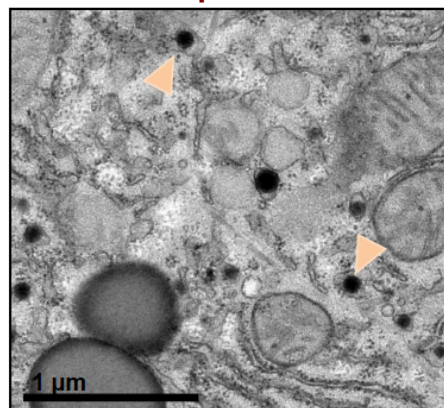**L-Lpcat3 KO**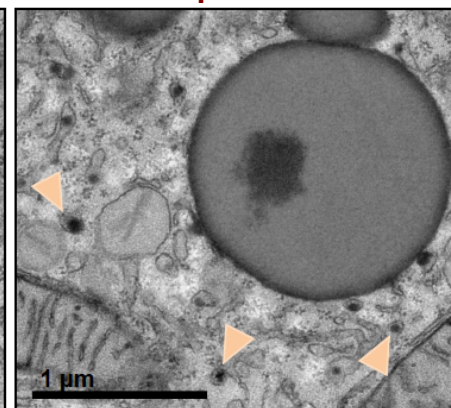**B****Flox/Flox**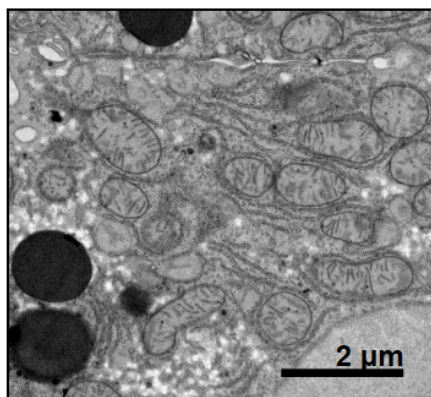**L-Lpcat3 KO**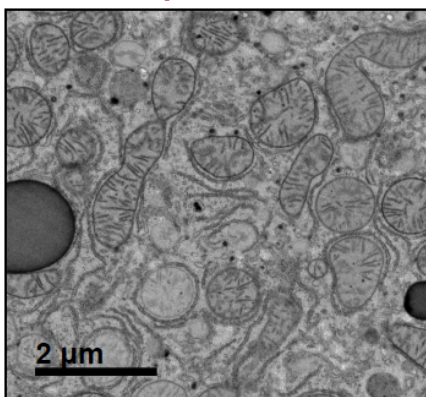**C****Flox/Flox**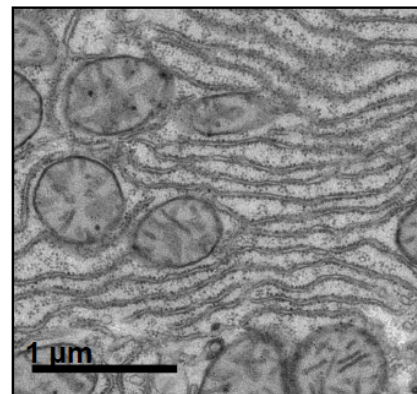**L-Lpcat3 KO**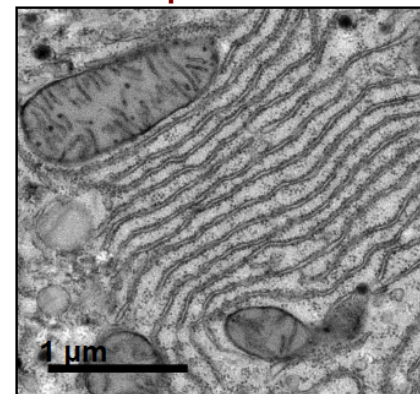

Supplement: supp [file elife_poa_e06557_Figure_9_figure_supplement_1.pdf › elife_poa_e06557_Figure_9_figure_supplement_1.pdf]
